# Supplementary material for: An Intestinal Symbiotic Bacterial Strain of Oscheius chongmingensis Modulates Host Viability at Both Global and Post-Transcriptional Levels
Source: Int J Mol Sci. 2022 Nov 24;23(23):14692. doi: 10.3390/ijms232314692 (PMC9739912; doi:10.3390/ijms232314692)
Supplement: Supplementary file 1 [file ijms-23-14692-s001.zip › Supplemental Figures.pdf]

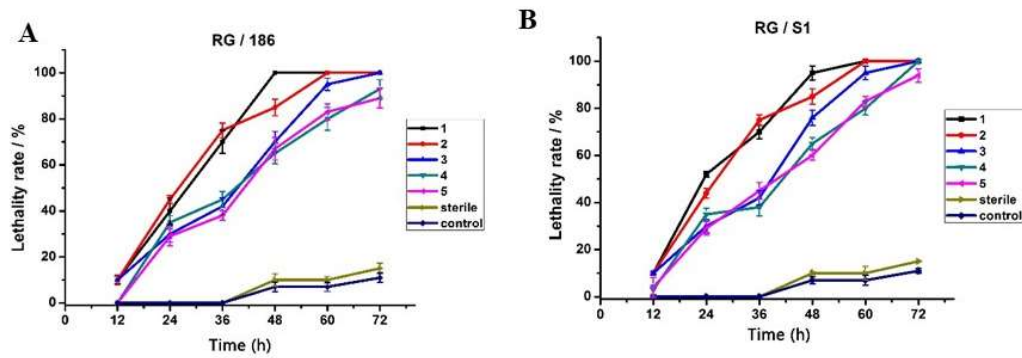

**Figure S1.** Pathogenicity changes of IJs of monoxenic nematode/bacterium combinations of *O. rugoensis* associated respectively with *S. nematodiphila* S1(A) and *S. nematodiphila* DR186 (B) after multigenerational passage through *G. mellonella* in vivo.

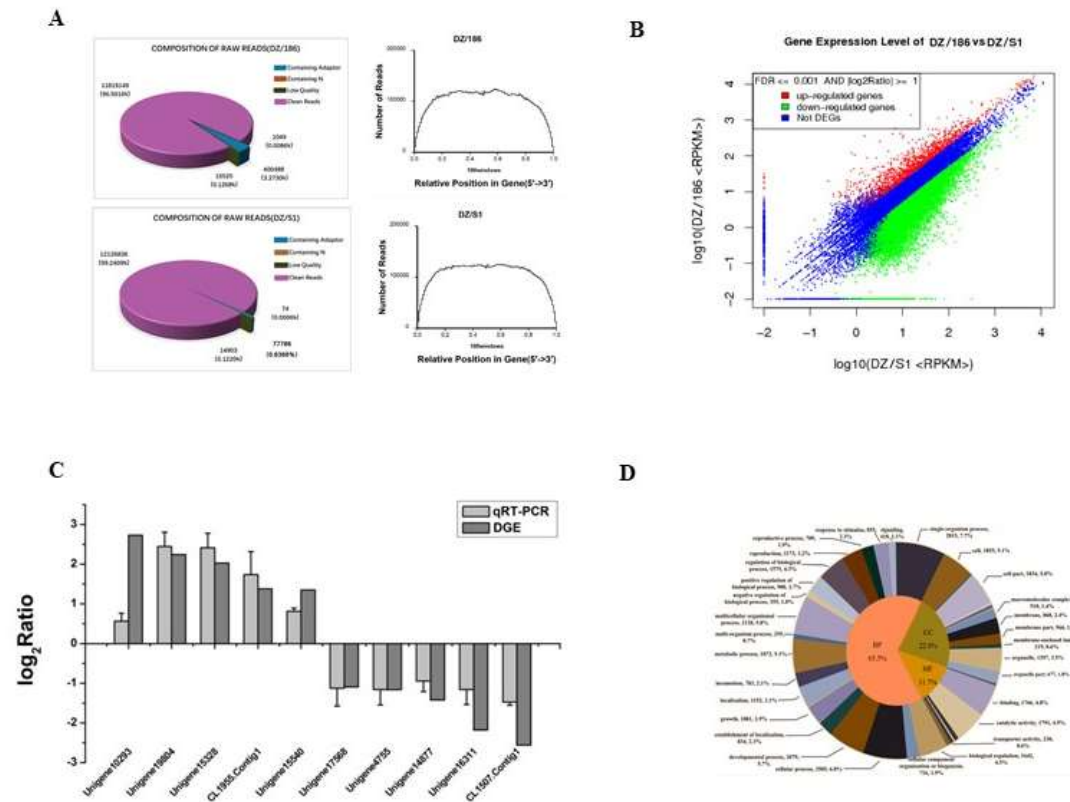

**Figure S2.** Global comparison analysis of mRNA sequencing data of native vs. non-native monoxenic *O. chongmingensis*; (A) Composition of total tags of the two DGE libraries of DZ/186 and DZ/S1. (B). DEG analysis between the two monoxenic combinations. (C). Validation of the RNA-Seq expression profiles of 10 genes randomly selected from among DEGs. (D). Gene ontology classification of all DEGs.

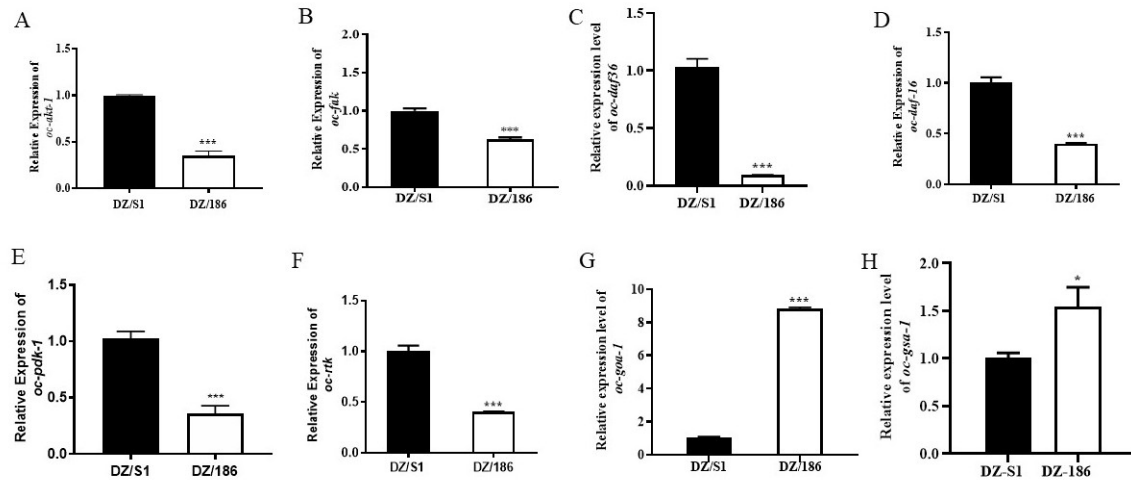

**Figure S3.** Expression levels of *oc-akt-1* (A), *oc-daf-16* (B), *oc-daf-36*(C), *oc-fak* (D), *oc-pdk-1*(E), and *oc-rtk* (F) are significantly downregulated in DZ/186 compared with DZ/S1, and those of *oc-goa-1* (G) and *oc-gsa-1* (H) are significantly upregulated in DZ/186.

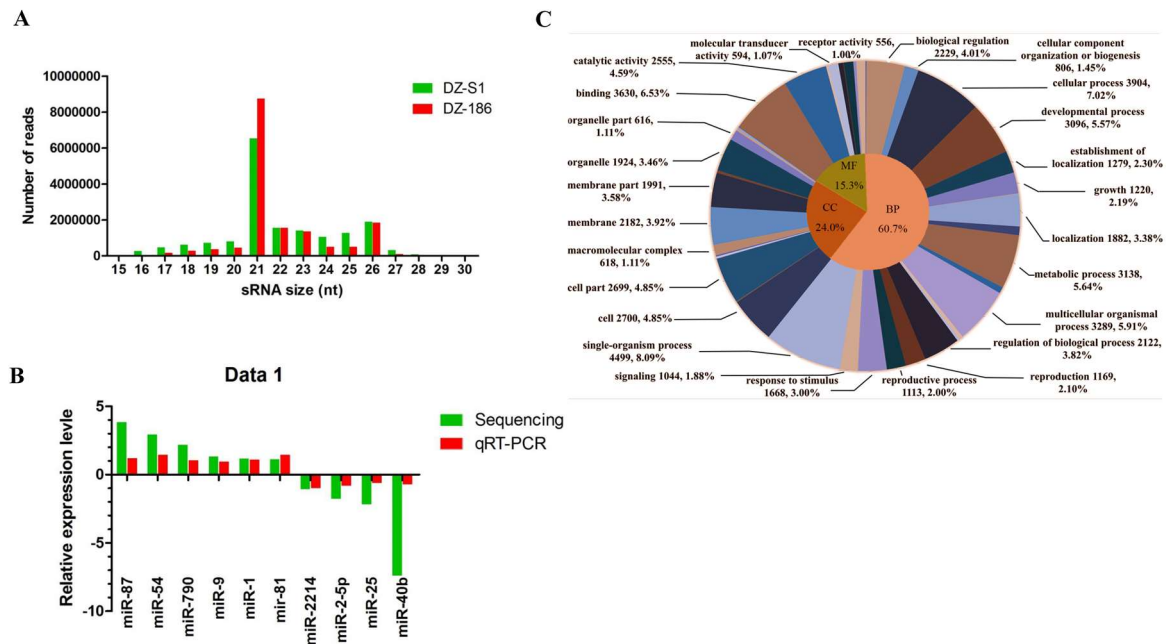

**Figure S4.** Global comparison analysis of miRNA sequencing data of native vs. non-native monoxenic *O. chongmingensis*; (A) Size distribution of small RNAs in DZ/S1 and DZ/186 libraries. (B) RT-qPCR validation of randomly-selected differentially expressed miRNAs. (C) Gene ontology classification of target transcripts for all differentially expressed miRNAs.
