# Supplementary material for: An Intestinal Symbiotic Bacterial Strain of Oscheius chongmingensis Modulates Host Viability at Both Global and Post-Transcriptional Levels
Source: Int J Mol Sci. 2022 Nov 24;23(23):14692. doi: 10.3390/ijms232314692 (PMC9739912; doi:10.3390/ijms232314692)
Supplement: Supplementary file 1 [file ijms-23-14692-s001.zip › Supplemental Tables.pdf]

**Table S1. The survival of combinations of *Osheius chongmingensis* and *Serratia nematodiphila* treated with heat stress**

| Combination | No. of worms | No. of mortality | Median survival (hours) | Log-rank test |
|-------------|--------------|------------------|-------------------------|---------------|
| DZ/S1       | 90           | 48               | 24                      | $P=0.0039$    |
| DZ/186      | 90           | 67               | 18                      |               |

**\*\* $P < 0.01$  DZ/186 vs DZ/S1**

**Table S2. The survival of combinations of *O. chongmingensis* and *S. nematodiphila* treated with oxidative stress**

| Groups | No. of worms | No. of mortality | Median survival (hours) | Log-rank test |
|--------|--------------|------------------|-------------------------|---------------|
| DZ/S1  | 90           | 88               | 15                      | $P<0.0001$    |
| DZ/186 | 90           | 90               | 10.5                    |               |

\*\*\* $P < 0.0001$  DZ/186 vs DZ/S1

**Table S3. Summary of the differential expressed miRNAs in DZ/S1 and DZ/186**

| <b>miRNA</b> | <b>Reads in<br/>DZ/S1</b> | <b>Reads in<br/>DZ-186</b> | <b>DZ/S1<br/>-std</b> | <b>DZ/186<br/>-std</b> | <b>Fold/change</b> | <b>p-value</b> |
|--------------|---------------------------|----------------------------|-----------------------|------------------------|--------------------|----------------|
| lin-4        | 13708                     | 26634                      | 841.83                | 1691.68                | 1.01               | 0              |
| miR-124      | 7862                      | 40113                      | 482.82                | 2547.82                | 2.40               | 0              |
| miR-1        | 82032                     | 178499                     | 5037.74               | 11337.53               | 1.17               | 0              |
| miR-2214     | 3518                      | 1624                       | 216.05                | 103.15                 | -1.07              | 8.99E-144      |
| miR-228      | 24676                     | 75759                      | 1515.40               | 4811.90                | 1.67               | 0              |
| miR-235      | 417                       | 2825                       | 25.61                 | 179.43                 | 2.81               | 0              |
| miR-2-5p     | 14598                     | 4147                       | 896.49                | 263.40                 | -1.77              | 0              |
| miR-34       | 2230                      | 12681                      | 136.95                | 805.45                 | 2.56               | 0              |
| miR-36a      | 734                       | 1662                       | 45.08                 | 105.56                 | 1.23               | 3.77E-89       |
| miR-40b      | 7123                      | 41                         | 437.44                | 2.60                   | -7.39              | 0              |
| miR-44       | 59484                     | 151540                     | 3653.03               | 9625.21                | 1.40               | 0              |
| miR-48       | 3564                      | 9211                       | 218.87                | 585.05                 | 1.42               | 0              |
| miR-49       | 1731                      | 6158                       | 106.30                | 391.13                 | 1.88               | 0              |
| miR-50       | 4335                      | 16203                      | 266.22                | 1029.15                | 1.95               | 0              |
| miR-54       | 4783                      | 35345                      | 293.73                | 2244.97                | 2.93               | 0              |
| miR-56       | 1282                      | 6224                       | 78.73                 | 395.32                 | 2.33               | 0              |
| miR-57       | 36035                     | 116087                     | 2212.98               | 7373.38                | 1.74               | 0              |
| miR-61       | 4304                      | 17330                      | 264.32                | 1100.73                | 2.06               | 0              |
| miR-63b      | 5450                      | 11154                      | 334.69                | 708.46                 | 1.08               | 0              |
| miR-71-5p    | 382341                    | 677094                     | 23480.29              | 43006.27               | 0.87               | 0              |
| miR-72-5p    | 35678                     | 120229                     | 2191.05               | 7636.46                | 1.80               | 0              |
| miR-787      | 493                       | 1002                       | 30.28                 | 63.64                  | 1.07               | 3.77E-44       |
| miR-790      | 754                       | 3302                       | 46.30                 | 209.73                 | 2.18               | 0              |
| miR-80       | 6628                      | 16082                      | 407.04                | 1021.46                | 1.33               | 0              |
| miR-81-3p    | 146277                    | 308316                     | 8983.15               | 19582.98               | 1.12               | 0              |
| miR-81-5p    | 527                       | 1091                       | 32.36                 | 69.30                  | 1.10               | 8.61E-50       |
| miR-82       | 6959                      | 16122                      | 427.37                | 1024.00                | 1.26               | 0              |
| miR-83       | 3127                      | 10277                      | 192.04                | 652.75                 | 1.77               | 0              |
| miR-84a      | 6817                      | 17328                      | 418.65                | 1100.60                | 1.39               | 0              |
| miR-86       | 665                       | 4594                       | 40.84                 | 291.79                 | 2.84               | 0              |

**Continued Table S3**

| <b>miRNA</b> | <b>Reads in<br/>DZ/S1</b> | <b>Reads in<br/>DZ-186</b> | <b>DZ/S1<br/>-std</b> | <b>DZ/186<br/>-std</b> | <b>Fold/change</b> | <b>p-value</b> |
|--------------|---------------------------|----------------------------|-----------------------|------------------------|--------------------|----------------|
| miR-87       | 186                       | 2549                       | 11.42                 | 161.90                 | 3.83               | 0              |
| miR-255      | 8                         | 54                         | 0.4913                | 3.4299                 | 2.80349            | 4.36E-10       |
| n_miR-10     | 0                         | 73                         | 0.01                  | 4.64                   | 8.86               | 3.01E-23       |
| n_miR-15     | 9                         | 33                         | 0.55                  | 2.10                   | 1.92               | 0.00011        |
| n_miR-23     | 0                         | 26                         | 0.01                  | 1.65                   | 7.37               | 9.42E-09       |
| n_miR-25     | 108                       | 23                         | 6.63                  | 1.46                   | -2.18              | 0              |
| n_miR-26     | 0                         | 39                         | 0.01                  | 2.48                   | 7.95               | 9.22E-13       |
| n_miR-27     | 12                        | 110                        | 0.74                  | 6.99                   | 3.25               | 5.59E-22       |
| n_miR-32     | 17                        | 0                          | 1.04                  | 0.01                   | -6.71              | 1.03E-05       |

**Table S4. Primers used for RT-qPCR analysis of expression level of unigenes or for RNA interference**

| unigene ID (Gene)          | Primer sequence           |                            |
|----------------------------|---------------------------|----------------------------|
|                            | Forward (5' to 3')        | Reverse (5' to 3')         |
| <i>18S rDNA</i>            | CATCCAAGGAAGGCAGCAGG      | CCGCAGCAATGACGATTACAC      |
| CL1507.Contigl             | TTGTAGGCTCCCCTCTTTCTGC    | CTTCGGTGGCAACACTCGTCT      |
| CL1955.Contigl             | TCCACAAGAACAGCACTGGTAGC   | TTGAGGATGTCGGACGAGAAGA     |
| Tnigene4755                | GTTGTGTTCCGCAGGTCATCG     | CTCCTTCTGTTCTTCGGGCTTGT    |
| Tnigene10293               | TCCGTTAGCTCCAGAACCTG      | TTCATCGGAGGAAGTGGAGG       |
| Tnigene14877               | TTTCCGTTCTCTCCAGGTGG      | CGTCCTCCTCAGTCTCCTTG       |
| Tnigene15328               | TCCTCAGCCTTTTCGTCCATT     | ACGAAGAGTGGGAACGAGTT       |
| Tnigene15540               | GAAGGACCTGCCTCATCACT      | GCGAGACGAGCGTATTTGTA       |
| Tnigene16311               | CTCCCGTCGCTCAGGAAGAT      | CCAATGGTGAAGAATGGGTTGA     |
| Tnigene17568               | GGAGGAGGAGTGATAGGCTC      | ATACGATCAGGGAGTCAGCG       |
| Tnigene19804               | CGAATGAGCCAATGACTCCG      | CCAAAGACCGTTCCAACCAG       |
| 6706 ( <i>oc-akt-1</i> )   | AAGGTTCTGGGCAAGGGTA       | CGACGGTTTGGAAGCTGTA        |
| <i>oc-akt-1</i> RNAi       | GCTGCAGCTGCAAGGAAAAGCGTT  | CCTCGAGGCCACACATCATTTTCGTA |
| 18057 ( <i>oc-daf-16</i> ) | AGTTGCATCAATGAGCGTCG      | TCTGAGCCTGGTTCTCTTCC       |
| <i>oc-daf-16</i> -RNAi     | CCTCGAGGCGGTGAATCGTCT     | GCTGCAGCCGAATCTCCTTTGT     |
| 22051( <i>oc-daf-36</i> )  | CACCCAGTTTGAAAGGGACATTT   | ATTGACCTTGCTCTGTTTGTGAT    |
| <i>oc-daf-36</i> RNAi      | CGAGCTCGGAGCTTGGGATTGTGGT | GGGTACCCCTTTCAAACCTGGGTG   |
| 10331 ( <i>oc-fak</i> )    | ATCCGAGTCCGTCTGGTTGC      | AGCTCATAGGCCGATTGTGG       |
| <i>oc-fak</i> -RNAi        | AAGCTTAAGCACATAAGGCAT     | CTGCAGGCAAGTGGACAATCA      |
| 15387 ( <i>oc- goa-1</i> ) | CTGGGAAGCAGATGGTAAGAGG    | GCTGACAGTGGAGTGCAGGAAT     |
| <i>oc-goa-1</i> -RNAi      | GCTGCAGCCAAAACACAAACGATG  | GGGTACCCCTCAGGCAGACAAGACT  |
| 10127 ( <i>oc- gsa-1</i> ) | ATAGGTTACGGGAGTCTCTGGC    | CTTCCTTGCTTCGCTTTGGTC      |
| <i>oc-gsa-1</i> -RNAi      | AAGCTTAGAAAACACAAAGAGA    | GGGTACCCGAGAGCGACTAAAAGC   |
| 12570 ( <i>oc-gsa-1</i> )  | GGAGTCGGGGAGGAAGGGA       | TTGGCAAGAGGGGAGGTGT        |
| <i>oc-goa-1</i> -RNAi      | CCTCGAGGCTGTTTCCAGTGTT    | GCTGCAGCCGTCTTGTCATTTT     |
| CL395 ( <i>oc-pdk-1</i> )  | ATACGCCGCGCCGTGTCTACTAC   | TTCCCTCTTCACAGCCTCATCC     |
| <i>oc-pdk-1</i> -RNAi      | CCTCGAGCCTGTCCAGCCTAT     | GCTGCAGCGTAGAACAAACGG      |
| 5468 ( <i>oc-rtk</i> )     | CTGTGTCGCTTTTTGTCCTG      | AACCTTGTTTAGATTTCGGGC      |
| <i>oc-rtk</i> -RNAi        | AAGCTTAGAAAACACAAAGAGA    | CTGCAGAGAGCGATAGAACAGT     |

**Table S5. Primers used for RT-qPCR analysis of expression of random selected and all the other miRNAs used in the present study.**

| miRNA          | Primer sequence             |                                     |
|----------------|-----------------------------|-------------------------------------|
|                | Forward (5' to 3')          | universal Reverse primer (5' to 3') |
| 5S (reference) | GCTTTCCCTTCAGTTGTTTCGG      | GGCCAACCGCGAGAAGATG                 |
| miR-1          | CGGACCTGGAATGTAAAGAAGTATGTA | GGCCAACCGCGAGAAGATG                 |
| miR-2-5p       | ACGCACAAGCGGTGGATGATG       | GGCCAACCGCGAGAAGATG                 |
| miR-40b        | GCTCACCGGGTGTA CTCTTC       | GGCCAACCGCGAGAAGATG                 |
| miR-54         | GACCGTACCCGTAATCTTCATAG     | GGCCAACCGCGAGAAGATG                 |
| miR-57         | CCTACCCTGTAGTACCGAGCTGTGT   | GGCCAACCGCGAGAAGATG                 |
| miR-71         | GCTATCACTATTCTGTTTTTCGCAAA  | GGCCAACCGCGAGAAGATG                 |
| miR-72-5p      | GAGGCAAGATGTTGGCATAGCTG     | GGCCAACCGCGAGAAGATG                 |
| miR-84a        | GTCTGCGTGAGGTAGTTGAAAATGTTA | GGCCAACCGCGAGAAGATG                 |
| miR-87-3p      | CACTCGTGAGCAAAGTTTCAGGT     | GGCCAACCGCGAGAAGATG                 |
| miR-255        | GACTAAACTGAAGAGATTTTTTACAG  | GGCCAACCGCGAGAAGATG                 |
| miR-790-5p     | GACTTGGCACTCGAGAACGAC       | GGCCAACCGCGAGAAGATG                 |
| miR-2214       | CACAACAGGTCCGGAGTGAATG      | GGCCAACCGCGAGAAGATG                 |

**Table S6. Primers used for miRNA-target interaction identification in the present study.**

| Gene                        | Primer sequence                                 |                                                 |
|-----------------------------|-------------------------------------------------|-------------------------------------------------|
|                             | Forward (5' to 3')                              | Reverse (5' to 3')                              |
| <i>oc-fak</i> (cDNA)        | ATCCGAGTCCGTCTGGTTGC                            | AGCTCATAGGCCGATTGTGG                            |
| <i>oc-fak</i> UTR           | GATGTAGACAGTGCATTCCAGAAAGT<br>TTC               | CGACGCGTCGGGAGAGGACACCGACCTTC<br>T              |
| <i>oc-fak</i><br>UTR-Mut    | GATGTAGACAGTGGTAAGGTGAAG<br>TTTC                | CGACGCGTCGGGAGAGGACACCGACCTTC<br>T              |
| <i>oc-goal-1</i> (cDNA)     | TTTTTTTTTGCAAAAACAA                             | CCAAGTTTGAGAGCTCGT                              |
| <i>oc-goal-1</i> UTR        | ATACAAACATATGATAAACTGTTTG<br>CTTACAATG          | CCGTTTTTACCTTTCTTCATTCGCATCGTTT<br>GTG          |
| <i>oc-goal-1</i><br>UTR-Mut | ATACAAACATATGATAAACTGAAAC<br>GAATGAATGAAACAC    | CCGTTTTTACCTTTCTTCATTCGCATCGTTT<br>GTG          |
| <i>oc-gsa-1</i> (cDNA)      | AAGAGCACAATCGTCAAG                              | CAGACAACAACCTTTATTT                             |
| <i>oc-gsa-1</i> UTR         | GCTATTGCTCATGCTCTACTTTCTTG<br>CCG               | GCAGTATGCCAAGGGCGTGCCG                          |
| <i>oc-gsa-1</i><br>UTR-Mut  | GCTATTGCTCATGCTCTACTTAGAA<br>CGGC               | GCAGTATGCCAAGGGCGTGCCG                          |
| <i>oc-pdk-1</i> (cDNA)      | CGCTGACTCGACTGCGTC                              | AATTATTATTATCATACA                              |
| <i>oc-pdk-1</i> UTR         | GGGTTTCTTCCTGGTGATTCCAGAA<br>TGCGTTAAATGCATTGGA | TTCTGGATAGTGTTGGAAGAAACCCAGAA<br>GGCTAGAATACAAC |
| <i>oc-pdk-1</i><br>UTR-Mut  | GGGTTTCTTCCAACACTATCCAGAA<br>TGCGTTAAATGCATTGGA | TTCTGGATAGTGTTGGAAGAAACCCAGAA<br>GGCTAGAATACAAC |
| <i>oc-rtk</i> (cDNA)        | CTGTGTCGCTTTTTGTCCTG                            | AACCTTGTTTAGATTCGGGC                            |
| <i>oc-rtk</i> UTR           | GACTAGTGGAACAACCGAATAACT                        | GAAGCTTAGAAGGCGTTTTACAGA                        |
| <i>oc-rtk</i><br>UTR-Mut    | GACTAGTGGAACCTGGCTTTAACTG<br>TTCTATCGCTCT       | GAAGCTTAGAAGGCGTTTTACAGA                        |
